# Supplementary material for: A 980 nm laser-activated upconverted persistent probe for NIR-to-NIR rechargeable in vivo bioimaging
Source: Royal Society of Chemistry journal article supplement (doi:10.1039/c6nr09716b), 2017-01-01
Supplement: c6nr09716b1.pdf [file c6nr09716b1.pdf]

## SUPPORTING INFORMATION

### 980 nm Laser-Activated Upconverted Persistent Probe for NIR-to-NIR Rechargeable *In Vivo* Bioimaging

Zhenluan Xue,<sup>a</sup> Xiaolong Li,<sup>a</sup> Youbin Li,<sup>a</sup> Mingyang Jiang,<sup>a</sup> Guozhong Ren,<sup>b</sup> Hongrong Liu,<sup>a</sup> Songjun Zeng,<sup>\*,a</sup> and Jianhua Hao,<sup>\*,c</sup>

<sup>a</sup> College of Physics and Information Science and Key Laboratory of Low-dimensional Quantum Structures and Quantum Control of the Ministry of Education, Synergetic Innovation Center for Quantum Effects and Applications, and Hunan Normal University, Changsha, Hunan, People's Republic of China. Email: [songjunz@hunnu.edu.cn](mailto:songjunz@hunnu.edu.cn)

<sup>b</sup> College of Physics, Changchun Normal University, Changchun, Jilin 130032 (China).

<sup>c</sup> Department of Applied Physics, The Hong Kong Polytechnic University, Hong Kong, China. Email: [jh.hao@polyu.edu.hk](mailto:jh.hao@polyu.edu.hk)

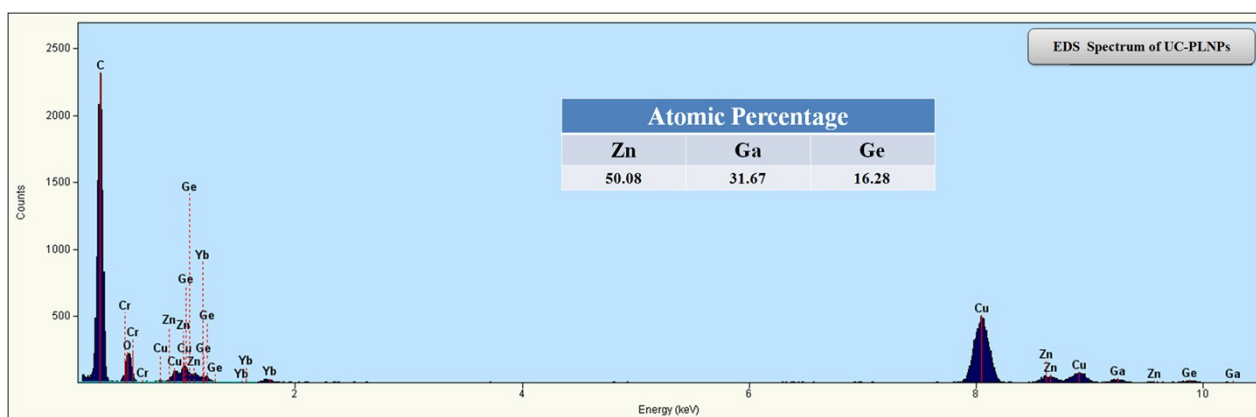

**Figure S1.** EDS pattern of the as-prepared  $\text{Zn}_3\text{Ga}_2\text{GeO}_8$ : Yb/Er/Cr UC-PLNPs.

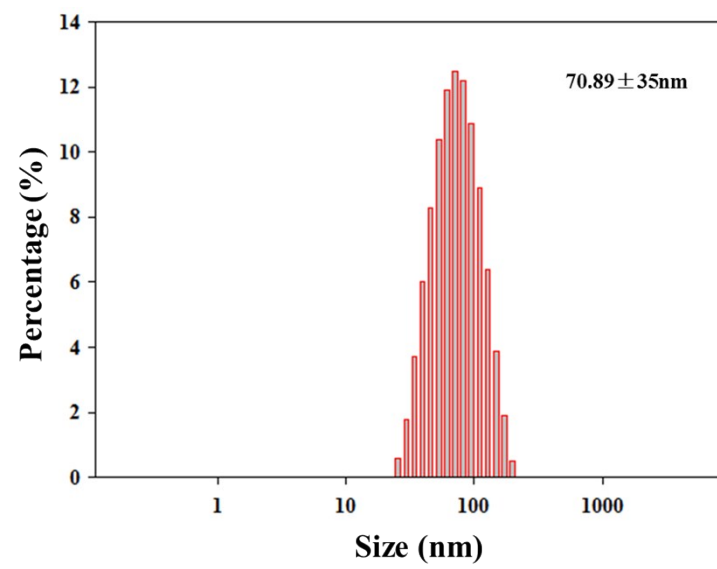

**Figure S2.** Size distribution of UC-PLNPs determined by DLS.

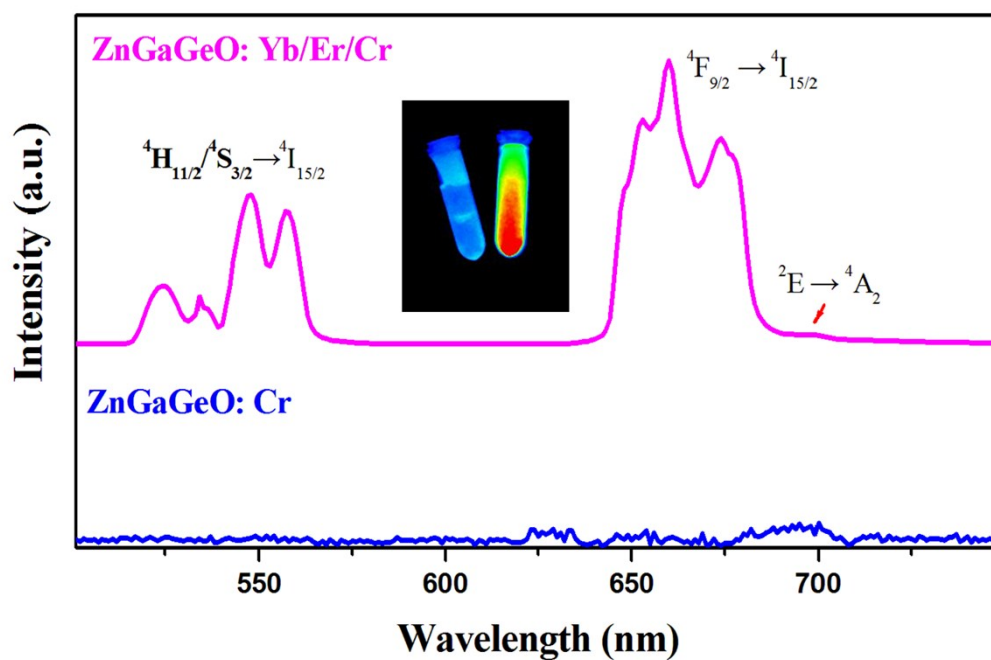

**Figure S3.** UC spectra of Zn<sub>3</sub>Ga<sub>2</sub>GeO<sub>8</sub>: Yb/Er/Cr and Zn<sub>3</sub>Ga<sub>2</sub>GeO<sub>8</sub>: Cr samples under excitation of 980 nm laser. The inset presents the UC emitting photograph of the two samples (left: Zn<sub>3</sub>Ga<sub>2</sub>GeO<sub>8</sub>: Cr, right: Zn<sub>3</sub>Ga<sub>2</sub>GeO<sub>8</sub>: Yb/Er/Cr) taken by a modified multi-modal imaging system (Bruker In Vivo FX Pro) under the excitation of 980 nm laser.

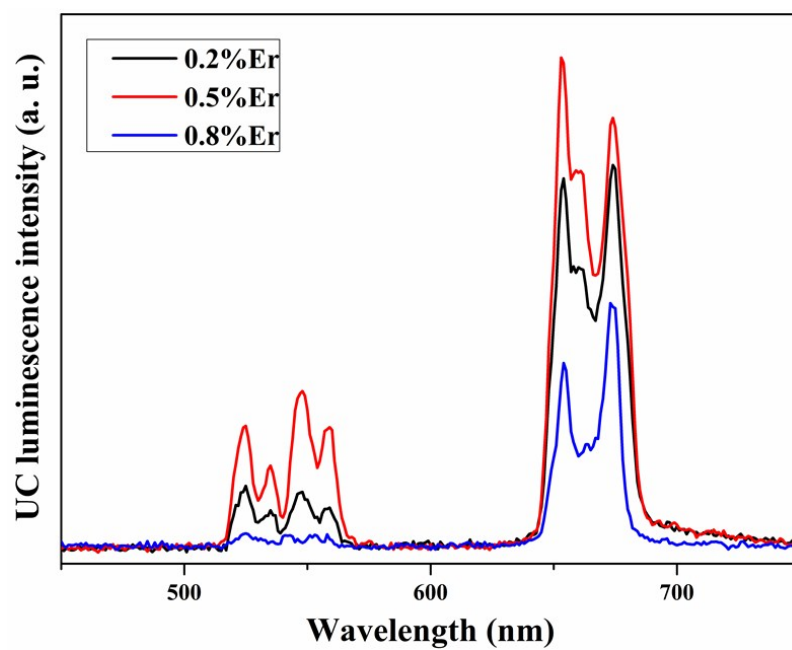

**Figure S4.** UC emission spectra of  $\text{Zn}_3\text{Ga}_2\text{GeO}_8: \text{Yb/Er/Cr}$  at different  $\text{Er}^{3+}$  concentrations (0.2%, 0.5% and 0.8%) at room temperature under the 980 nm laser excitation.

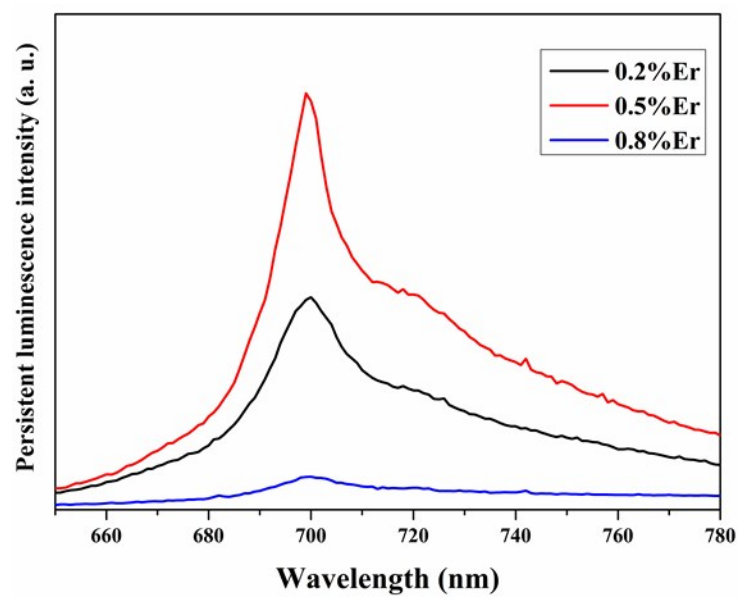

**Figure S5.** Persistent luminescence spectra of Zn<sub>3</sub>Ga<sub>2</sub>GeO<sub>8</sub>: Yb/Er/Cr at different Er<sup>3+</sup> concentrations (0.2%, 0.5% and 0.8%).

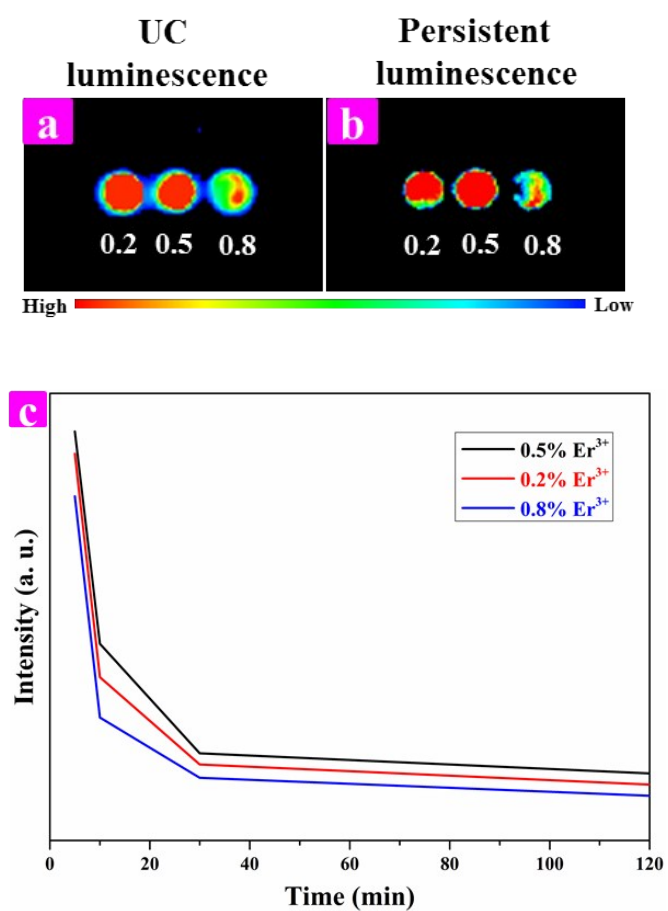

Figure S6. In vitro phantom UC luminescence imaging (a) and NIR persistent luminescence imaging (b) of UC-PLNPs doped with different  $\text{Er}^{3+}$  concentrations by a 980 nm laser excitation with power density of 150 mW/cm<sup>2</sup>, (c) decay curves of persistent luminescence intensity.

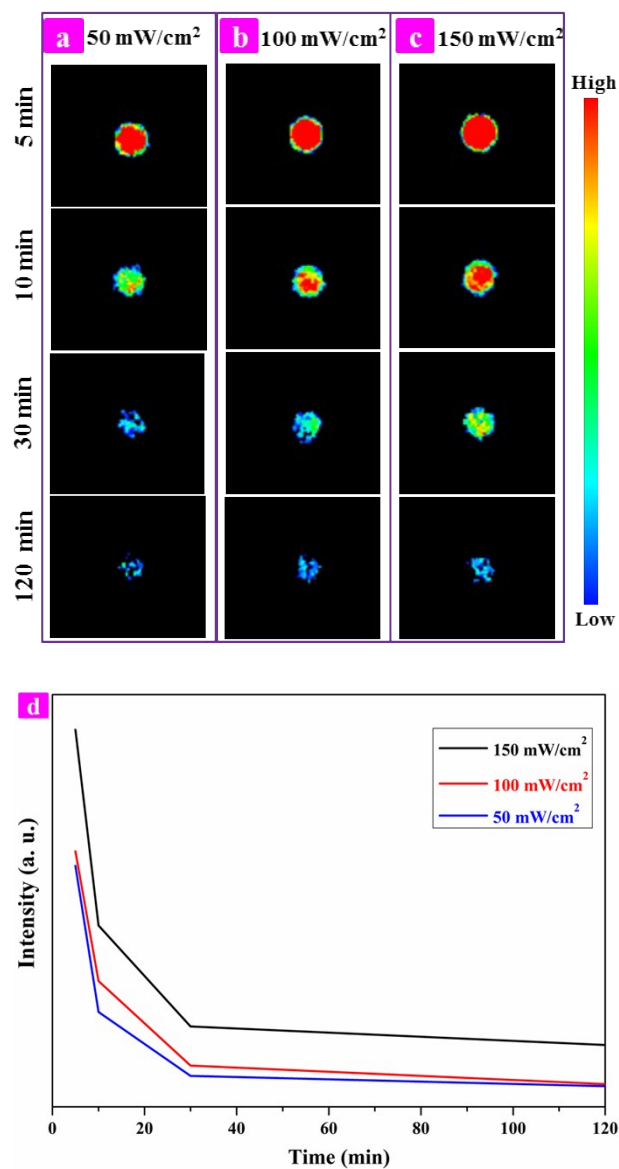

**Figure S7.** *In vitro* phantom UC persistent imaging of UC-PLNPs charged with different 980 nm power densities: (a) 50 mW/cm<sup>2</sup>, (b) 100 mW/cm<sup>2</sup>, (c) 150 mW/cm<sup>2</sup>, (d) decay curves of persistent luminescence intensity.



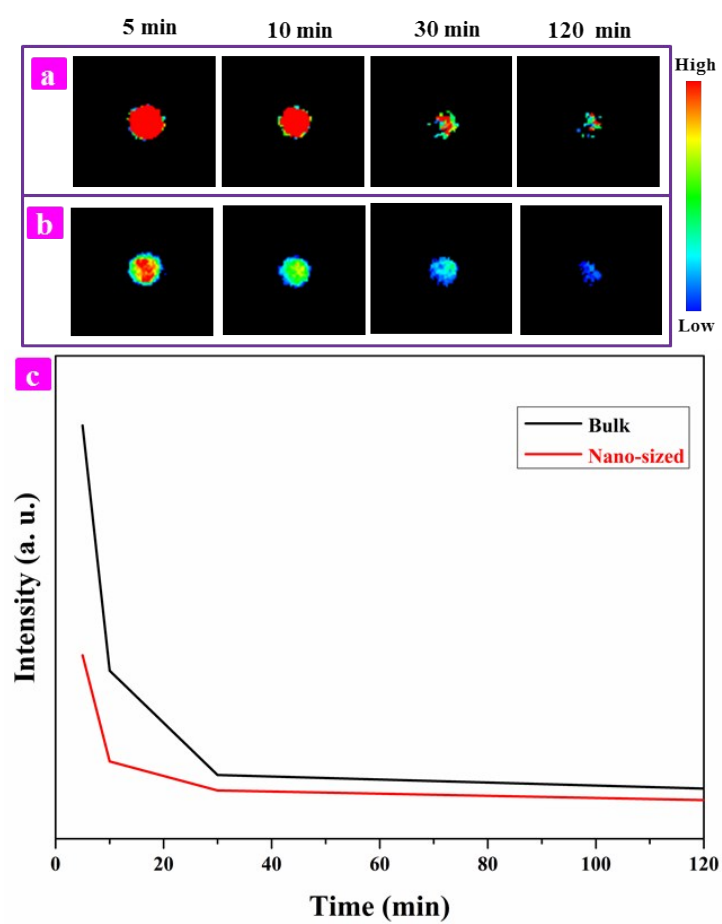

**Figure S8.** *In vitro* persistent imaging of UC-PLNPs (a) bulk, (b) nano-sized nanoparticles after 980 nm (150 mW/cm<sup>2</sup>) excitation, (c) decay curves of persistent luminescence intensity.

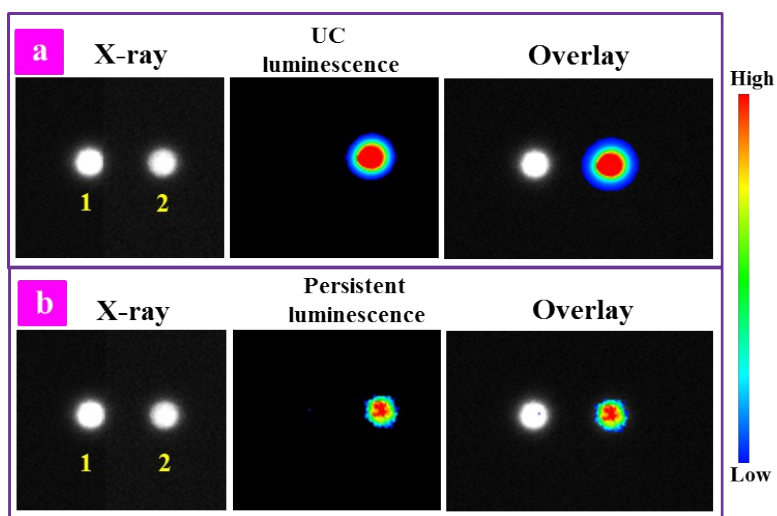

**Figure S9.** *In vitro* (a) UC luminescence, (b) persistent luminescence imaging of UC-PLNPs under the 980 nm laser excitation at power density of 150 mW/cm<sup>2</sup>, 1 and 2 present Zn<sub>3</sub>Ga<sub>2</sub>GeO<sub>8</sub>: Cr and Zn<sub>3</sub>Ga<sub>2</sub>GeO<sub>8</sub>: Yb/Er/Cr samples.

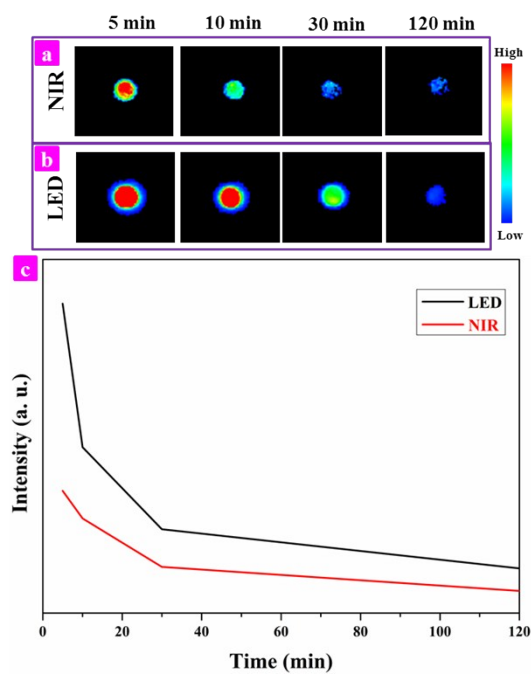

**Figure S10.** *In vitro* persistent imaging of UC-PLNPs activated by (a) NIR (980 nm laser, 150 mW/cm<sup>2</sup>) , (b) LED, (c) decay curves of persistent luminescence intensity.

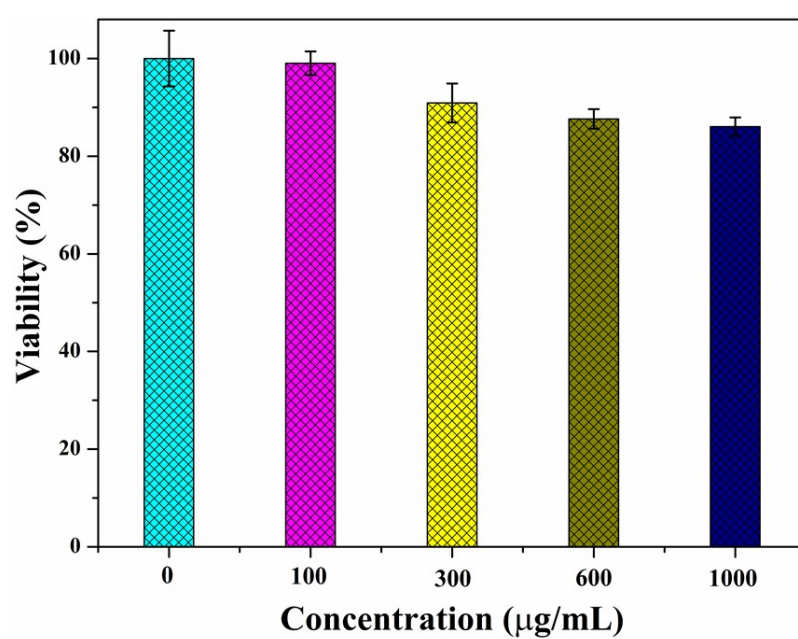

**Figure S11.** Effect of different concentrations of UC-PLNPs on the viability of Hek293 cells measured by MTT assay.

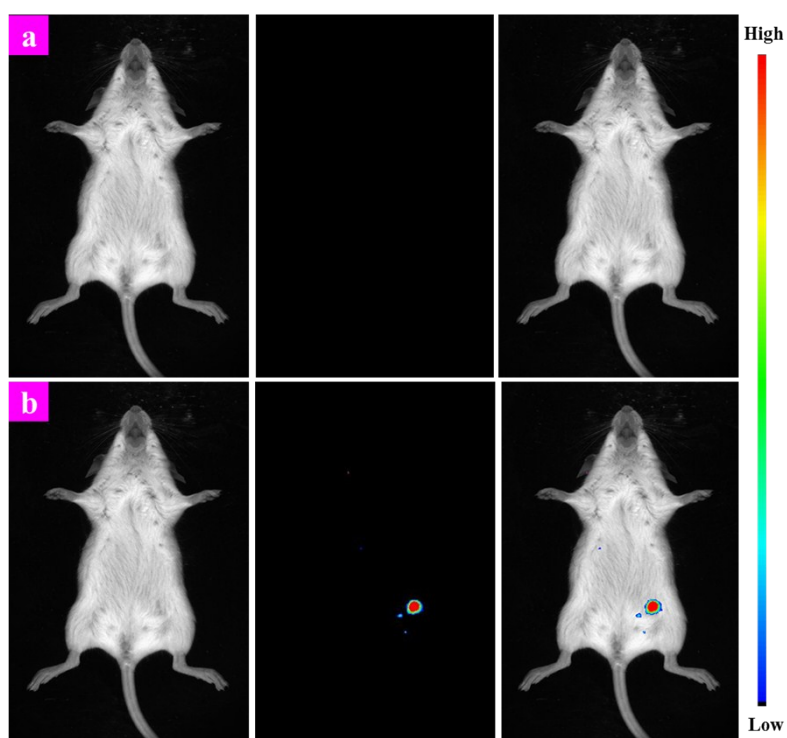

**Figure S12.** *In vivo* UC optical bioimaging: (a) without and (b) with subcutaneous injection of the designed UC-PLNPs.

The left panel: White light images; the middle panel: UC images, by detection of 550 nm green UC luminescence; the right panel: overlay images.

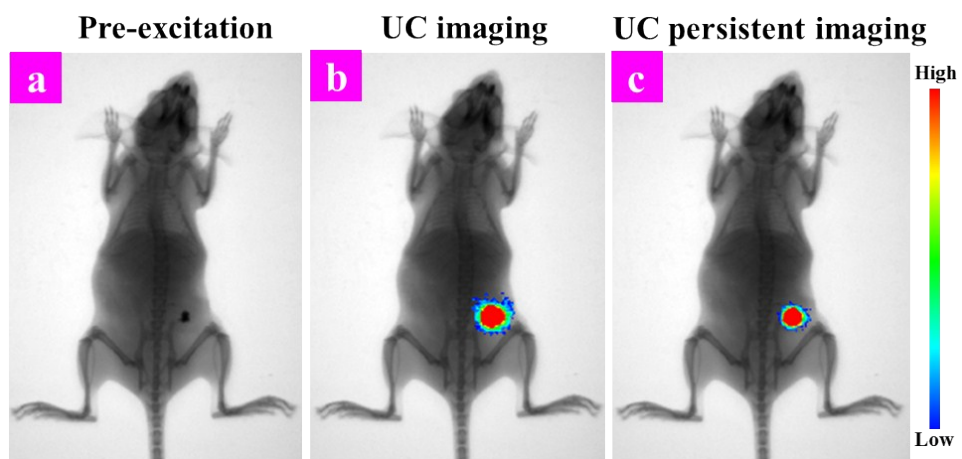

**Figure S13.** *In vivo* optical bioimaging of a mouse subcutaneously injected with UC-PLNPs under 980 nm (150 mW/cm<sup>2</sup>) excitation: (a) pre-excitation, (b) UC imaging and (c) UC persistent imaging.
